# Supplementary material for: Fish-gut-on-chip: development of a microfluidic bioreactor to study the role of the fish intestinein vitro
Source: Royal Society of Chemistry journal article supplement (doi:10.1039/c9lc00415g), 2019-01-01
Supplement: c9lc00415g1.pdf [file c9lc00415g1.pdf]

Electronic Supplementary Material (ESI) for Lab on a Chip

Supporting Information

## **Fish-gut-on-chip: Development of a microfluidic bioreactor to study the role of the fish intestine *in vitro***

**Carolin Drieschner,<sup>ab</sup> Sarah Könemann,<sup>ac</sup> Philippe Renaud<sup>b</sup> and Kristin Schirmer<sup>\*acd</sup>**

<sup>a</sup>*Department of Environmental Toxicology, Eawag (Swiss Federal Institute of Aquatic Science and Technology), Dübendorf, Switzerland Address here.*

<sup>b</sup>*Microsystems Laboratory 4, School of Architecture, EPFL (École Polytechnique Fédérale de Lausanne), Lausanne, Switzerland Address here.*

<sup>c</sup>*Department of Civil and Environmental Engineering, School of Architecture, EPFL (École Polytechnique Fédérale de Lausanne), Lausanne, Switzerland*

<sup>d</sup>*Department of Environmental Systems Science, ETHZ (Swiss Federal Institute of Technology in Zurich), Zürich, Switzerland*

\*Corresponding author: [kristin.schirmer@eawag.ch](mailto:kristin.schirmer@eawag.ch)

Supplementary Materials

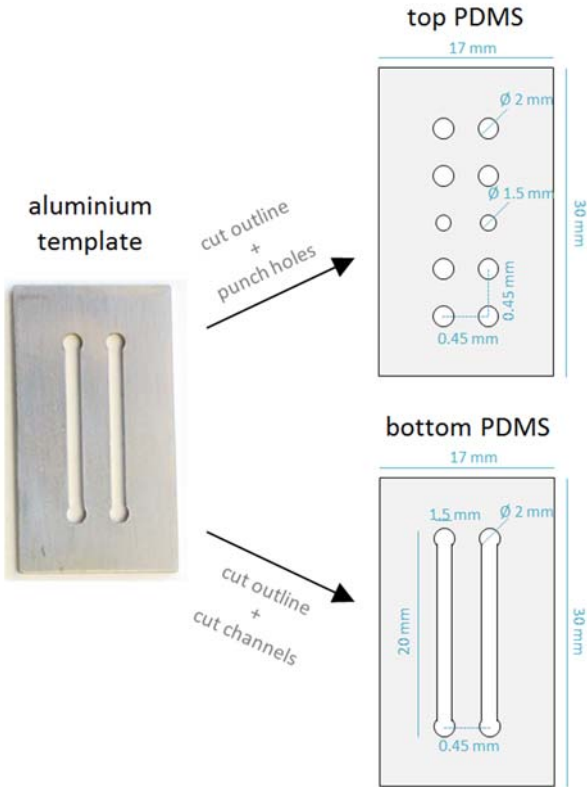

**Figure S1.** Manufacturing of PDMS sheets for integration in the fish-gut-on-chip. Spin-coated sheets of PDMS were cut to shape by using the aluminium template, a scalpel and a 2 mm and a 1.5 mm puncher.
